# Supplementary material for: Hypertension treatment practices and its determinants among ambulatory patients: retrospective cohort study in Ethiopia
Source: PubMed Central journal article supplement — BMJ Open. 2017 Aug 3;7(8):e015743. doi: 10.1136/bmjopen-2016-015743 (PMC5724212; doi:10.1136/bmjopen-2016-015743), 2017-08-03
Supplement: bmjopen-2016-015743supp001.pdf [file bmjopen-2016-015743supp001.pdf]

**HYPERTENSION TREATMENT PRACTICES AND ITS DETERMINANTS AMONG AMBULATORY PATIENTS:**

**A RETROSPECTIVE COHORT STUDY IN ETHIOPIA**

**Supplement Table 1 Determinants of achieving target BP (BP < 140/90) at index visit ambulatory hypertension patients (sensitivity analysis with adherence definition of MMAS ≥ 6)**

| Variables                                            | Controlled BP |           | Bivariable estimates<br>OR [95% CI] | Multivariable<br>estimate<br>OR [95% CI] |                    |
|------------------------------------------------------|---------------|-----------|-------------------------------------|------------------------------------------|--------------------|
|                                                      | No            | Yes       |                                     |                                          |                    |
| <b>Demographics</b>                                  |               |           |                                     |                                          |                    |
| Age (mean, SD), year                                 | 58 (13)       | 56 (15)   | #0.99 [0.98; 1.00]                  | *0.99 [0.98; 1.00]                       |                    |
| Gender (n, %)                                        | Male          | 219 (67)  | 109 (33)                            | Ref                                      |                    |
|                                                      | Female        | 331 (60)  | 220 (40)                            | #1.34 [1.00; 1.78]                       | 1.12 [0.81; 1.55]  |
| Hospital type (n, %)                                 | Specialized   | 199 (68)  | 93 (32)                             | Ref                                      |                    |
|                                                      | General       | 363 (60)  | 242 (40)                            | *1.43 [1.06; 1.92]                       | *1.88 [1.25; 2.81] |
| <b>Disease characteristics at index visit (n, %)</b> |               |           |                                     |                                          |                    |
| Renal disease                                        | No            | 542 (62)  | 330 (38)                            | Reference                                |                    |
|                                                      | Yes           | 20 (80)   | 5 (20)                              | #0.41 [0.15; 1.10]                       | 0.60 [0.20; 1.79]  |
| Controlled BP at prior visit                         | No            | 424 (68)  | 199 (32)                            | *0.37 [0.27; 0.51]                       | *0.30 [0.21; 0.43] |
|                                                      | Yes           | 102 (44)  | 129 (56)                            | Ref                                      |                    |
| <b>Antihypertensive Treatment characteristics</b>    |               |           |                                     |                                          |                    |
| Duration of therapy, years (mean, SD)                |               | 6.2(6.4)  | 7.4 (8.3)                           | #1.02 [1.00; 1.04]                       | *1.04 [1.02; 1.06] |
| Adherent (MMAS ≥ 6) (n, %)                           | No            | 237 (63)  | 140 (37)                            | Ref                                      |                    |
|                                                      | Yes           | 315 (62)  | 194 (38)                            | 1.04 [0.79; 1.37]                        | 1.14 [0.83; 1.56]  |
| Revisit schedule in months (Mean,                    |               | 2.2 (1.4) | 2.0 (1.2)                           | *0.89 [0.82 ;0.97]                       | 0.91 [0.82; 1.02]  |
| Beta blockers (n, %)                                 | No            | 472 (65)  | 259 (35)                            | Ref                                      |                    |
|                                                      | Yes           | 90 (54)   | 76 (46)                             | *1.54 [1.09; 2.16]                       | 1.45 [0.98; 2.15]  |
| Diuretics (n, %)                                     | No            | 243 (59)  | 168 (41)                            | Reference                                |                    |
|                                                      | Yes           | 319 (66)  | 167 (34)                            | *0.76 [0.58; 0.99]                       | *0.68 [0.50; 0.94] |

Variables with #p < 0.20 or \*p < 0.05 in the bivariable model were included in this multivariable model (sensitivity analysis).

**Supplement Table 2 Prescribed antihypertensive medication(s) in the study population**

| Drug prescribed per case | At Index visit<br>(n <sup>‡</sup> = 887), % | At Prior visit<br>(n <sup>‡</sup> = 882), % |
|--------------------------|---------------------------------------------|---------------------------------------------|
| D (Diuretics)            | 14.3                                        | 15.0                                        |
| C (CCBs)                 | 13.0                                        | 13.7                                        |
| A (ACE inhibitors)       | 9.9                                         | 11.0                                        |
| B (BBs)                  | 0.8                                         | 1.4                                         |
| D + C                    | 9.4                                         | 8.6                                         |
| D + A                    | 17.0                                        | 16.6                                        |
| C + A                    | 11.5                                        | 10.2                                        |
| A + B                    | 2.6                                         | 2.4                                         |
| C + B                    | 2.4                                         | 2.7                                         |
| D + B                    | 2.0                                         | 1.5                                         |
| D + C + B                | 1.5                                         | 1.1                                         |
| D + C + A                | 6.1                                         | 6.1                                         |
| A + C + B                | 3.7                                         | 3.5                                         |
| D + A + B                | 2.7                                         | 2.5                                         |
| D + A + B + C            | 3.2                                         | 3.7                                         |

CCBs, calcium channel blockers; ACE, Angiotensinogen Converting Enzyme; BBs; Beta Blockers

<sup>‡</sup>The table did not include rarely used medication categories. These drugs were methyldopa, losartan, hydralazine, and nitrates and in combination with others or as a monotherapy.

**Supplement Table 3 Sensitivity analyses: determinants for controlled hypertension at alternative BP target (BP < 130/80 mm Hg) for patients with DM and/or renal disease, and all other patients BP < 140/90 mm Hg)**

| Variables                                          | Controlled BP       |           | Bivariable OR [95% CI] | Multivariable OR [95% CI] |                    |
|----------------------------------------------------|---------------------|-----------|------------------------|---------------------------|--------------------|
|                                                    | No                  | Yes       |                        |                           |                    |
| <b>Demographics</b>                                |                     |           |                        |                           |                    |
| Age (mean, SD)                                     | 58 (13)             | 56 (15)   | #0.99 [0.98; 1.00]     | 0.99 [0.98; 1.00]         |                    |
| Gender (n, %)                                      | Male                | 244 (74)  | 84 (26)                | Ref                       |                    |
|                                                    | Female              | 373 (68)  | 178 (32)               | *1.39 [1.02; 1.88]        | 1.30 [0.87; 1.95]  |
| Smoking (n, %)                                     | No                  | 572 (69)  | 254 (31)               | Ref                       |                    |
|                                                    | Yes                 | 45 (79)   | 12 (21)                | #0.60 [0.31; 1.16]        | 1.05 [0.50; 2.24]  |
| Alcohol use (n, %)                                 | No                  | 354 (72)  | 140 (28)               | Ref                       |                    |
|                                                    | Yes                 | 254 (67)  | 124 (33)               | #1.23 [0.92; 1.65]        | 1.54 [1.07; 2.21]  |
| Marital status (n, %)                              | Single              | 207 (67)  | 104 (33)               | Ref                       |                    |
|                                                    | Married             | 406 (72)  | 161 (28)               | #0.79 [0.59; 1.06]        | 0.82 [0.56; 1.18]  |
| Educational status (n, %)                          | College/University  | 123 (72)  | 47 (28)                | Ref                       |                    |
|                                                    | Secondary           | 103 (73)  | 38 (27)                | 1.21 [0.83; 1.77]         |                    |
|                                                    | Primary /not formal | 381 (68)  | 176 (32)               | 0.97 [0.59; 1.59]         |                    |
| Hospital type (n, %)                               | Specialized         | 217 (74)  | 75 (26)                | Ref                       |                    |
|                                                    | General             | 412 (68)  | 193 (32)               | 1.36 [0.99; 1.85]         | 1.17 [0.75; 1.82]  |
| <b>Disease characteristics (n, %)</b>              |                     |           |                        |                           |                    |
| Dyslipidemia at index visit                        | No                  | 583 (69)  | 257(31)                | Ref                       |                    |
|                                                    | Yes                 | 46 (81)   | 11 (19)                | #0.54 [0.28; 1.06]        | 0.47 [0.20; 1.10]  |
| Heart Failure / MI at index visit                  | No                  | 578 (70)  | 247 (30)               | Ref                       |                    |
|                                                    | Yes                 | 51 (71)   | 21 (29)                | 0.96 [0.57; 1.64]         |                    |
| Controlled BP at prior visit                       | No                  | 501 (77)  | 151 (23)               | *0.25 [0.18; 0.35]        | *0.25 [0.17; 0.37] |
|                                                    | Yes                 | 92 (46)   | 110 (55)               | Ref                       |                    |
| <b>Antihypertensive treatment characteristics</b>  |                     |           |                        |                           |                    |
| Duration of therapy years (mean, SD)               |                     | 7.0 (7.3) | 5.8 (6.9)              | #0.98 [0.96; 1.00]        | 0.99 [0.97; 1.02]  |
| Adherence (MMAS-8 ≥ 7) (n, %)                      | No                  | 373 (70)  | 158 (29)               | Ref                       |                    |
|                                                    | Yes                 | 246 (69)  | 109 (31)               | 1.04 [0.78; 1.40]         |                    |
| Revisit schedule in months (Mean, SD)              |                     | 2.4 (2.1) | 2.0 (1.2)              | *0.88 [0.81; 0.97]        | 0.94 [0.84; 1.06]  |
| Therapy at prior visit (n, %)                      | Monotherapy         | 240 (66)  | 123 (34)               | Ref                       |                    |
|                                                    | Multidrug therapy   | 378 (73)  | 143 (27)               | *0.74 [0.55; 0.99]        | 1.02 [0.69; 1.51]  |
| <b>Antihypertensive medications at prior visit</b> |                     |           |                        |                           |                    |
| ACE inhibitors (n, %)                              | No                  | 274 (68)  | 129 (32)               | Ref                       |                    |
|                                                    | Yes                 | 355 (72)  | 139 (28)               | 0.83 [0.62; 1.11]         |                    |
| Beta blockers (n, %)                               | No                  | 511 (70)  | 220 (30)               | Ref                       |                    |
|                                                    | Yes                 | 118 (71)  | 48 (29)                | 0.95 [0.65; 1.37]         |                    |
| Calcium channel blockers (n, %)                    | No                  | 312 (68)  | 146 (32)               | Ref                       |                    |
|                                                    | Yes                 | 317 (72)  | 122 (28)               | #0.82 [0.62; 1.10]        | 0.88 [0.59; 1.31]  |
| Diuretics (n, %)                                   | No                  | 276 (67)  | 135 (33)               | Ref                       |                    |
|                                                    | Yes                 | 353 (73)  | 133 (27)               | #0.77 [0.58; 1.03]        | *0.60 [0.40; 0.90] |

**Supplement Table 4 Determinants of achieving target BP (BP < 140/90) at index visit in ambulatory hypertensive patients**

| Variables                                                                | Odds ratio at 95% CI |                        |
|--------------------------------------------------------------------------|----------------------|------------------------|
|                                                                          | Bivariable estimates | Multivariable estimate |
| <b>Demographics</b>                                                      |                      |                        |
| Age [year]                                                               |                      |                        |
| < 35                                                                     | Ref                  |                        |
| 35-44                                                                    | 0.56 [0.27; 1.18]    | 0.51 [0.24; 1.10]      |
| 45-54                                                                    | 0.51 [0.25; 1.03]    | 0.53 [0.26; 1.10]      |
| 55-64                                                                    | 0.40 [0.20; 0.80]    | 0.41 [0.20; 0.83]      |
| ≥ 65                                                                     | 0.50 [0.25; 0.99]    | 0.46 [0.22; 0.93]      |
| Gender                                                                   | Male                 | Ref                    |
|                                                                          | Female               | *1.34 [1.00; 1.78]     |
| Smoking                                                                  | No                   | Ref                    |
|                                                                          | Yes                  | 0.89 [0.51; 1.56]      |
| Alcohol use                                                              | No                   | Ref                    |
|                                                                          | Yes                  | 1.06 [0.81; 1.40]      |
| Marital status                                                           | Single               | Ref                    |
|                                                                          | Married              | 0.87 [0.66; 1.16]      |
| Educational status                                                       | College/University   | Ref                    |
|                                                                          | Secondary            | 1.17 [0.74; 1.86]      |
|                                                                          | Primary /not formal  | 1.13 [0.79; 1.61]      |
| Hospital type                                                            | Specialized          | Ref                    |
|                                                                          | General              | *1.43 [1.06; 1.92]     |
| <b>Disease characteristics</b>                                           |                      |                        |
| Number of cardiometabolic comorbid illnesses                             |                      | 0.86 [0.69; 1.06]      |
| Hypertension severity at prior visit                                     |                      |                        |
| Normal BP (systolic BP < 120 and diastolic BP < 80 mm Hg)                |                      | Ref                    |
| Pre-hypertensive stage (systolic BP 120-139 or diastolic BP 80-89 mm Hg) |                      | 0.83 [0.45; 1.53]      |
| Stage I hypertension (systolic BP 140-159 or diastolic BP 90-99 mm Hg)   |                      | *0.40 [0.21; 0.72]     |
| Stage II hypertension (systolic BP ≥ 160 or diastolic BP ≥ 100 mm Hg)    |                      | *0.25 [0.14; 0.46]     |
|                                                                          |                      | 0.80 [0.40; .62]       |
|                                                                          |                      | *0.34 [0.17; .67]      |
|                                                                          |                      | *0.17 [0.09; .35]      |
| <b>Antihypertensive Treatment characteristics</b>                        |                      |                        |
| Duration of therapy, years (mean, SD)                                    |                      | #1.02 [1.00; 1.04]     |
| Adherent (MMAS ≥ 7)                                                      | No                   | Ref                    |
|                                                                          | Yes                  | #0.79 [0.60; 1.04]     |
| Revisit schedule in months (Mean, SD)                                    |                      | *0.89 [0.82 ;0.97]     |
| Therapy at prior visit                                                   | Monotherapy          | Ref                    |
|                                                                          | Multidrug therapy    | 0.98 [0.74; 1.29]      |
| Antihypertensive medications at prior visit                              |                      |                        |
| ACE inhibitors                                                           | No                   | Ref                    |
|                                                                          | Yes                  | 1.13 [0.86; 1.49]      |
| Beta blockers                                                            | No                   | Ref                    |
|                                                                          | Yes                  | *1.54 [1.09; 2.16]     |
| Calcium channel blockers                                                 | No                   | Ref                    |
|                                                                          | Yes                  | 1.06 [0.81 ;1.39]      |
| Diuretics                                                                | No                   | Reference              |
|                                                                          | Yes                  | *0.76 [0.58; 0.99]     |
|                                                                          |                      | *0.68 [0.49;0.94]      |

Difference with the main analysis (Table 2): Age categorical, prior BP based on severity, and comorbid illness count included.

**Supplement Table 5 Treatment intensification determinants for ambulatory hypertensive patients with uncontrolled BP at index visit**

| Variables                                                              |                              | Bivariable estimates<br>OR [95% CI] | Multivariable estimate<br>OR [95% CI] |
|------------------------------------------------------------------------|------------------------------|-------------------------------------|---------------------------------------|
| <b>Demographics</b>                                                    |                              |                                     |                                       |
| Age, Year                                                              | < 35                         | Ref                                 |                                       |
|                                                                        | 35-44                        | 1.53 [0.39; 5.99]                   | 1.25 [0.31; 5.02]                     |
|                                                                        | 45-54                        | 1.45 [0.39; 5.38]                   | 1.08 [0.28; 4.10]                     |
|                                                                        | 55-64                        | 1.95 [0.55; 6.96]                   | 1.20 [0.33; 5.49]                     |
|                                                                        | ≥ 65                         | 2.03 [0.57; 7.26]                   | 1.49 [0.41; 2.22]                     |
|                                                                        | Gender                       | Male                                | Ref                                   |
| Female                                                                 |                              | #1.35 [0.88; 2.07]                  | 1.40 [0.86; 1.29]                     |
| Smoking                                                                | No                           | Ref                                 |                                       |
|                                                                        | Yes                          | 0.88 [0.37; 2.07]                   |                                       |
| Alcohol use                                                            | No                           | Ref                                 |                                       |
|                                                                        | Yes                          | 0.75 [0.49; 1.15]                   |                                       |
| Marital status                                                         | Single                       | Ref                                 |                                       |
|                                                                        | Married                      | 0.93 [0.60; 1.43]                   |                                       |
| Educational status                                                     | College/University           | Ref                                 |                                       |
|                                                                        | Secondary                    | 1.54 [0.80; 2.97]                   |                                       |
|                                                                        | Primary /no formal education | 0.95 [0.56; 1.62]                   |                                       |
| Hospital type                                                          | Specialized                  | Ref                                 |                                       |
|                                                                        | General                      | #0.68 [0.43; 1.06]                  | 0.78 [0.48 1.29]                      |
| <b>Disease characteristics</b>                                         |                              |                                     |                                       |
| Cardiometabolic comorbid illness at current visit                      |                              | #1.15 [0.86; 1.52]                  | 1.04 [0.74; 1.45]                     |
| Hypertension severity at prior visit                                   |                              |                                     |                                       |
| Normal BP (systolic BP < 120 and diastolic BP < 80 mm Hg)              |                              | Ref                                 |                                       |
| Pre-hypertensive stage (systolic BP 120-139 or diastolic BP 80-89)     |                              | 0.65 [0.20; 2.07]                   |                                       |
| Stage-I hypertension (systolic BP 140-159 or diastolic BP 90-99 mm Hg) |                              | 0.93 [0.32; 2.68]                   |                                       |
| Stage-II hypertension (systolic BP ≥ 160 or diastolic BP ≥ 100 mm Hg)  |                              | 1.15 [0.40; 3.26]                   |                                       |
| <b>Antihypertensive treatment characteristics</b>                      |                              |                                     |                                       |
| Duration of therapy years (mean SD)                                    |                              | *1.05 [1.02; 1.08]                  | *1.05 [1.02; 1.08]                    |
| Adherence (MMAS ≥ 7)                                                   | No                           | Ref                                 |                                       |
|                                                                        | Yes                          | 0.88 [0.58; 1.32]                   |                                       |
| Therapy at prior visit                                                 | Monotherapy                  | Ref                                 |                                       |
|                                                                        | Multidrug therapy            | 0.89 [0.59; 1.34]                   |                                       |

Difference with the main analysis (table 3): Age grouped, prior BP based on severity, and comorbid illness count included.

**Supplement Table 6 Determinants of achieving target BP (BP < 140/90) at current visit in ambulatory hypertensive patients (For patient with ≥ 6 months on antihypertensive medication).**

| Variables                                         | Odds ratio at 95% CI                                   |                                               |
|---------------------------------------------------|--------------------------------------------------------|-----------------------------------------------|
|                                                   | Bivariable estimates                                   | Multivariable estimate                        |
| <b>Demographics</b>                               |                                                        |                                               |
| Age [year]                                        | #0.99 [0.98; 1.00]                                     | *0.99 [0.98; 1.00]                            |
| Gender                                            | Male<br>Female                                         | Ref<br>*1.26 [0.93; 1.71]                     |
| Smoking                                           | No<br>Yes                                              | Ref<br>0.92 [0.51; 1.66]                      |
| Alcohol use                                       | No<br>Yes                                              | Ref<br>1.06 [0.79; 1.42]                      |
| Marital status                                    | Single<br>Married                                      | Ref<br>0.87 [0.65; 1.18]                      |
| Educational status                                | College/University<br>Secondary<br>Primary /not formal | Ref<br>1.31 [0.81; 2.13]<br>1.14 [0.79; 1.66] |
| Hospital type                                     | Specialized<br>General                                 | Ref<br>*1.48 [1.08; 2.02]                     |
| Diabetes Mellitus                                 | No<br>Yes                                              | Ref<br>*2.03 [1.34; 3.06]                     |
| Dyslipidemia                                      | No<br>Yes                                              | Ref<br>0.59 [0.18; 1.99]                      |
| Renal disease                                     | No<br>Yes                                              | Ref<br>0.59 [0.18; 1.99]                      |
| Heart failure/ MI at                              | No<br>Yes                                              | Ref<br>0.59 [0.18; 1.99]                      |
| Controlled BP at prior visit                      | Yes<br>No                                              | Ref<br>*0.30 [0.21; 0.44]                     |
| <b>Antihypertensive Treatment characteristics</b> |                                                        |                                               |
| Duration of therapy, years (mean, SD)             |                                                        | #1.02 [1.00; 1.04]                            |
| Adherent (MMAS ≥ 7)                               | No<br>Yes                                              | Ref<br>*0.79 [0.58; 1.05]                     |
| Revisit schedule in months (Mean, SD)             |                                                        | *0.87 [0.79 ;0.96]                            |
| Therapy at prior visit                            | Monotherapy<br>Multidrug therapy                       | Ref<br>1.01 [0.75; 1.36]                      |
| Antihypertensive medications at prior visit       |                                                        |                                               |
| ACE inhibitors                                    | No<br>Yes                                              | Ref<br>1.15 [0.86; 1.55]                      |
| Beta blockers                                     | No<br>Yes                                              | Ref<br>*1.52 [1.06; 2.17]                     |
| Calcium channel blockers                          | No<br>Yes                                              | Ref<br>1.06 [0.79 ;1.41]                      |
| Diuretics                                         | No<br>Yes                                              | Reference<br>*0.75 [0.56; 1.00]               |
